# Supplementary material
Source: ML conference proceedings conference paper supplement (https://proceedings.neurips.cc/paper_files/paper/2009/hash/9ad6aaed513b73148b7d49f70afcfb32-Abstract.html)
Supplement: Supplementary file [file 9ad6aaed513b73148b7d49f70afcfb32-Supplemental.zip]

## Supplementary Document for “Submodularity Cuts and Applications”

In this supplementary material, we give the detail of a way to compute  $\gamma$ -extensions in Sect. A and an outline of the submodular maximization algorithm by Nemhauser and Wolsey [16] in Sect. B.

### A Details of the computation of $\gamma$ -extensions

Here, we describe a way to compute the  $\gamma$ -extensions of the directions  $\mathbf{d}_1, \dots, \mathbf{d}_n$  chosen in Sect. 3.1 of our manuscript. Let  $S$  be a set with  $|S| = k$ , and let  $i^*$  and  $j^*$  are specified elements in  $S$  and  $V \setminus S$ , respectively, and suppose that  $S = \{i_1, \dots, i_k\}$  with  $i_1 = i^*$  and  $V \setminus S = \{j_{k+1}, \dots, j_n\}$  with  $j_n = j^*$ . Remember that we chose the directions  $\mathbf{d}_1, \dots, \mathbf{d}_n$  as

$$\mathbf{d}_l = \begin{cases} \mathbf{e}_{j^*} - \mathbf{e}_{i_l} & \text{if } l \in \{1, \dots, k\} \\ \mathbf{e}_{j_l} - \mathbf{e}_{j^*} & \text{if } l \in \{k+1, \dots, n-1\} \\ -\mathbf{e}_{j^*} & \text{if } l = n, \end{cases} \quad (8)$$

and gave the following lemma (Lemma 6 in Sect. 3.1):

**Lemma 6** *For the directions  $\mathbf{d}_1, \dots, \mathbf{d}_n$  defined in Eqs. (8), a cone*

$$K(\mathbf{I}_S; \mathbf{d}_1, \dots, \mathbf{d}_n) = \{\mathbf{I}_S + t_1 \mathbf{d}_1 + \dots + t_n \mathbf{d}_n : t_l \geq 0\}$$

*contains the polytope  $D_0 = \{\mathbf{x} \in \mathbb{R}^n : 0 \leq x_l \leq 1 \ (l = 1, \dots, n), \sum_{l=1}^n x_l \leq k\}$ .*

**Proof** Let  $T \subset V$  be an arbitrary fixed set with  $|T| \leq k$ . We have that  $T \in S(D_0)$  and  $\mathbf{I}_T \in V(D_0)$ . To show the assertion, it suffices to show  $\mathbf{I}_T \in K(\mathbf{I}_S; \mathbf{d}_1, \dots, \mathbf{d}_n)$  because of the one-to-one correspondence between  $S(D_0)$  and  $V(D_0)$ . Let us partition the set  $S$  into three parts  $S_1 = \{i'_1, \dots, i'_{|S \cap T|}\}$ ,  $S_2 = \{i'_{|S \cap T|+1}, \dots, i'_{|T|}\}$ , and  $S_3 = \{i'_{|T|+1}, \dots, i'_k\}$ , where

$$S_1 = S \cap T \quad \text{and} \quad S_2 \cup S_3 = S \setminus T.$$

In addition, we partition the set  $T$  into two parts  $T_1 = T \cap S = S_1$  and  $T_2 = T \setminus S = \{j'_{|S \cap T|+1}, \dots, j'_{|T|}\}$ . Then, we have

$$\begin{aligned} \mathbf{I}_T &= \mathbf{I}_S - \mathbf{I}_{S \setminus T} + \mathbf{I}_{T \setminus S} \\ &= \mathbf{I}_S + (\mathbf{I}_{T_2} - \mathbf{I}_{S_2}) - \mathbf{I}_{S_3} \\ &= \mathbf{I}_S + \sum_{l=|S \cap T|+1}^{|T|} (\mathbf{e}_{j'_l} - \mathbf{e}_{i'_l}) + \sum_{l=|T|+1}^k (-\mathbf{e}_{i'_l}) \\ &= \mathbf{I}_S + \sum_{l=|S \cap T|+1}^{|T|} \{(\mathbf{e}_{j'_l} - \mathbf{e}_{j^*}) + (\mathbf{e}_{j^*} - \mathbf{e}_{i'_l})\} + \sum_{l=|T|+1}^k \{(\mathbf{e}_{j^*} - \mathbf{e}_{i'_l}) + (-\mathbf{e}_{j^*})\}. \end{aligned}$$

Therefore, we obtain  $\mathbf{I}_T \in \{\mathbf{I}_S + t_1 \mathbf{d}_1 + \dots + t_n \mathbf{d}_n : t_l \geq 0\}$ . ■

Suppose that  $\mathbf{I}_S$  is a vertex of a polytope  $P \subseteq D_0$  and  $\gamma$  is a constant number such that  $f(S) \leq \gamma$  and  $f(S_{(i,j)}) \leq \gamma$  for any neighbor  $S_{(i,j)}$  of  $S$ . For the directions  $\mathbf{d}_1, \dots, \mathbf{d}_n$  defined in Eqs. (8), the submodularity cuts algorithm requires the  $\gamma$ -extensions  $\mathbf{y}_l = \mathbf{I}_S + \theta_l \mathbf{d}_l$  ( $l = 1, \dots, n$ ) with respect to the Lovász extension  $\hat{f} : \mathbb{R}^n \rightarrow \mathbb{R}$ . To obtain these  $\gamma$ -extensions, it suffices to consider the following three cases.

- For  $i \in S$  and  $j^* \in V \setminus S$ , compute a  $\gamma$ -extension  $\mathbf{y}^{(1)} = \mathbf{I}_S + \theta^{(1)}(\mathbf{e}_{j^*} - \mathbf{e}_i)$ .
- For two distinct  $j, j^* \in V \setminus S$ , compute a  $\gamma$ -extension  $\mathbf{y}^{(2)} = \mathbf{I}_S + \theta^{(2)}(\mathbf{e}_j - \mathbf{e}_{j^*})$ .
- For  $j^* \in V \setminus S$ , compute a  $\gamma$ -extension  $\mathbf{y}^{(3)} = \mathbf{I}_S + \theta^{(3)}(-\mathbf{e}_{j^*})$ .

Let us give explicit representations of  $\theta^{(1)}$ ,  $\theta^{(2)}$  and  $\theta^{(3)}$ .

#### A.1 Computation of $\theta^{(1)}$

We have  $\theta^{(1)} = \max\{t \geq 0 : \hat{f}(\mathbf{y}(t)) \leq \gamma\}$ , where  $\mathbf{y}(t) := \mathbf{I}_S + t(\mathbf{e}_{j^*} - \mathbf{e}_i)$ . Note that  $f(S) = \hat{f}(\mathbf{y}(0)) \leq \gamma$  and  $f(S_{(i,j^*)}) = \hat{f}(\mathbf{y}(1)) \leq \gamma$ . The convexity of  $\hat{f}$  implies  $\theta^{(1)} \geq 1$ . Thus,

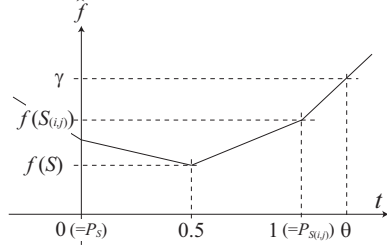

Figure 1: Determination of  $\theta$  in computing the  $\gamma$ -extension through Lovász extension for  $l \in \{1, \dots, k\}$  (cf. Eq. (8)).

we consider a parameter  $t \geq 1$ . The different components of  $\mathbf{y}(t)$  are ordered as  $t \geq 1 > 0 \geq 1 - t$ , and  $\mathbf{y}(t)$  can be represented as

$$\mathbf{y}(t) = (t - 1) \cdot \mathbf{I}_{\{j^*\}} + 1 \cdot \mathbf{I}_{S_{(i,j^*)}} + (t - 1) \cdot \mathbf{I}_{V \setminus \{i\}} + (1 - t) \cdot \mathbf{I}_V.$$

In view of the definition of the Lovász extension, the value of  $\hat{f}(\mathbf{y}(t))$  is given by

$$\begin{aligned} \hat{f}(\mathbf{y}(t)) &= (t - 1) \cdot f(\{j^*\}) + 1 \cdot f(S_{(i,j^*)}) + (t - 1) \cdot f(V \setminus \{i\}) + (1 - t) \cdot f(V) \\ &= f(S_{(i,j^*)}) + (t - 1) \left\{ f(\{j^*\}) + f(V \setminus \{i\}) - f(V) \right\}. \end{aligned}$$

So,  $\theta^{(1)}$  is bounded if and only if  $\frac{d}{dt} \hat{f}(\mathbf{y}(t)) = f(\{j^*\}) + f(V \setminus \{i\}) - f(V) > 0$ . As a result, we have the following (see also Fig. 1):

$$\theta^{(1)} = \begin{cases} 1 + \frac{\gamma - f(S_{(i,j^*)})}{f(\{j^*\}) + f(V \setminus \{i\}) - f(V)} & \text{if } f(\{j^*\}) + f(V \setminus \{i\}) - f(V) > 0, \\ +\infty & \text{otherwise.} \end{cases}$$

## A.2 Computation of $\theta^{(2)}$

We have  $\theta^{(2)} = \max\{t \geq 0 : \hat{f}(\mathbf{y}(t)) \leq \gamma\}$ , where  $\mathbf{y}(t) := \mathbf{I}_S + t(\mathbf{e}_j - \mathbf{e}_{j^*})$ . Note that  $f(S) = \hat{f}(\mathbf{y}(0)) \leq \gamma$ . First, we suppose that  $t \in [0, 1]$ . The different components of  $\mathbf{y}(t)$  are ordered as  $1 \geq t > 0 \geq -t$  and  $\mathbf{y}(t)$  can be represented as

$$\mathbf{y}(t) = (1 - t) \cdot \mathbf{I}_S + t \cdot \mathbf{I}_{S \cup \{j\}} + t \cdot \mathbf{I}_{V \setminus \{j^*\}} + (-t) \cdot \mathbf{I}_V.$$

Thus, the value of  $\hat{f}(\mathbf{y}(t))$  is given by

$$\begin{aligned} \hat{f}(\mathbf{y}(t)) &= (1 - t) \cdot f(S) + t \cdot f(S \cup \{j\}) + t \cdot f(V \setminus \{j^*\}) + (-t) \cdot f(V) \\ &= f(S) + t \cdot \left\{ f(S \cup \{j\}) + f(V \setminus \{j^*\}) - f(S) - f(V) \right\} =: g^{\text{low}}(t). \end{aligned}$$

If  $\gamma < g^{\text{low}}(1)$ , we obtain  $\frac{d}{dt} g^{\text{low}}(t) = f(S \cup \{j\}) + f(V \setminus \{j^*\}) - f(S) - f(V) > 0$  and thus  $\theta^{(2)} = \frac{\gamma - f(S)}{f(S \cup \{j\}) + f(V \setminus \{j^*\}) - f(S) - f(V)}$ . Otherwise, we have  $\theta^{(2)} \geq 1$ .

Next, we suppose that  $g^{\text{low}}(1) \leq \gamma$  and  $1 \leq t$ . The different components of  $\mathbf{y}(t)$  are ordered as  $t \geq 1 > 0 \geq -t$  and  $\mathbf{y}(t)$  can be represented as

$$\mathbf{y}(t) = (t - 1) \cdot \mathbf{I}_{\{j\}} + 1 \cdot \mathbf{I}_{S \cup \{j\}} + t \cdot \mathbf{I}_{V \setminus \{j^*\}} + (-t) \cdot \mathbf{I}_V.$$

Thus, the value of  $\hat{f}(\mathbf{y}(t))$  is given by

$$\begin{aligned} \hat{f}(\mathbf{y}(t)) &= (t - 1) \cdot f(\{j\}) + 1 \cdot f(S \cup \{j\}) + t \cdot f(V \setminus \{j^*\}) + (-t) \cdot f(V) \\ &= f(S \cup \{j\}) - f(\{j\}) + t \cdot \left\{ f(\{j\}) + f(V \setminus \{j^*\}) - f(V) \right\} =: g^{\text{high}}(t). \end{aligned}$$

On the assumption that  $g^{\text{low}}(1) \leq \gamma$ ,  $\theta^{(2)}$  is bounded if and only if  $\frac{d}{dt} g^{\text{high}}(t) = f(\{j\}) + f(V \setminus \{j^*\}) - f(V) > 0$ . As a result, we obtain

$$\theta^{(2)} = \begin{cases} \frac{\gamma - f(S)}{f(S \cup \{j\}) + f(V \setminus \{j^*\}) - f(S) - f(V)} & \text{if } \gamma < g^{\text{low}}(1), \\ \frac{\gamma - f(S \cup \{j\}) + f(\{j\})}{f(\{j\}) + f(V \setminus \{j^*\}) - f(V)} & \text{if } \gamma \geq g^{\text{low}}(1) \text{ and } \frac{d}{dt} g^{\text{high}}(t) > 0, \\ +\infty & \text{if } \gamma \geq g^{\text{low}}(1) \text{ and } \frac{d}{dt} g^{\text{high}}(t) \leq 0. \end{cases}$$

Note that  $g^{\text{low}}(1) = g^{\text{high}}(1)$ ,  $\frac{d}{dt} g^{\text{low}}(t) \leq \frac{d}{dt} g^{\text{high}}(t)$  and  $\hat{f}(\mathbf{y}(t)) = \min\{g^{\text{low}}(t), g^{\text{high}}(t)\}$  for all  $t \geq 0$ .

---

**Algorithm 3** Description of the algorithm by Nemhauser and Wolsey.

---

```

1: Let  $Q_1 = \{T_1, \dots, T_m\}$  be a set of distinct subsets of  $V$ .
2: Set  $\text{stop} \leftarrow \text{false}$  and  $i \leftarrow 1$ .
3: while  $\text{stop} = \text{false}$  do
4:   Solve the MIP problem (S1) with respect to  $Q_i$ , and let  $(\eta_i, \mathbf{I}_{S_i})$  be an optimal solution.
5:   if  $f(S_i) = \eta_i$  then
6:      $\text{stop} \leftarrow \text{true}$  ( $S_i$  is an optimal solution and  $\eta_i$  the optimal value).
7:   else
8:     Set  $Q_{i+1} \leftarrow Q_i \cup \{S_i\}$  and  $i \leftarrow i + 1$ 
9:   end if
10: end while

```

---

**Remark:** If  $f(S) = \gamma$ , then  $\theta^{(2)}$  can be equal to 0. In such a case, we choose a small  $\delta > 0$  and replace  $\theta^{(2)}$  by  $\delta$  so that the resulting submodularity cut  $H$  satisfies Lemma 4.

### A.3 Computation of $\theta^{(3)}$

We have  $\theta^{(3)} = \max\{t \geq 0 : \hat{f}(\mathbf{y}(t)) \leq \gamma\}$ , where  $\mathbf{y}(t) := \mathbf{I}_S - t \cdot \mathbf{e}_{j^*}$ . Note that  $f(S) = \hat{f}(\mathbf{y}(0)) \leq \gamma$ . Consider a parameter  $t \geq 0$ . The different components of  $\mathbf{y}(t)$  are ordered as  $1 > 0 \geq -t$  and  $\mathbf{y}(t)$  can be represented as

$$\mathbf{y}(t) = 1 \cdot \mathbf{I}_S + t \cdot \mathbf{I}_{V \setminus \{j^*\}} + (-t) \cdot \mathbf{I}_V.$$

Thus, the value of  $\hat{f}(\mathbf{y}(t))$  is given by

$$\hat{f}(\mathbf{y}(t)) = 1 \cdot f(S) + t \cdot f(V \setminus \{j^*\}) + (-t) \cdot f(V) = f(S) + t \{f(V \setminus \{j^*\}) - f(V)\}.$$

So,  $\theta^{(3)}$  is bounded if and only if  $\frac{d}{dt} \hat{f}(\mathbf{y}(t)) = f(V \setminus \{i\}) - f(V) > 0$ . Thus, we have

$$\theta^{(3)} = \begin{cases} \frac{\gamma - f(S)}{f(V \setminus \{j^*\}) - f(V)} & \text{if } f(V \setminus \{i\}) - f(V) > 0, \\ +\infty & \text{otherwise.} \end{cases}$$

In particular, if  $f$  is nondecreasing, it holds that  $f(V \setminus \{i\}) \leq f(V)$  and thus we have  $\theta^{(3)} = +\infty$ .

## B Outline of the algorithm by Nemhauser & Wolsey

Throughout this section, we assume that  $f : 2^V \rightarrow \mathbb{R}$  is nondecreasing. Nemhauser and Wolsey [16] showed that the submodular maximization problem

$$\max_{S \subseteq V} f(S) \quad \text{s.t. } |S| \leq k \tag{1}$$

can be reformulated as

$$\begin{aligned} \max_{\eta, \mathbf{y}} \quad & \eta \\ \text{s.t.} \quad & \eta \leq f(S) + \sum_{j \in V \setminus S} \rho_j(S) y_j, \quad \forall S \in 2^V, \\ & \sum_{j \in V} y_j = k, \quad y_j \in \{0, 1\}, \quad \forall j \in V, \end{aligned} \tag{10}$$

where  $\rho_j(S) := f(S \cup \{j\}) - f(S)$ . Specifically,  $(\eta, \mathbf{y}) = (f(S), \mathbf{I}_S)$  is an optimal solution to (10) if and only if  $S$  is an optimal solution to (1). Let us denote the optimal value of (10) by  $\eta^*$ . The problem (10) is a mixed integer program (MIP) with  $O(2^n)$  inequalities, and it would be intractable because of the number of constraints.

We describe the algorithm of Nemhauser and Wolsey [16] for the submodular maximization problem (1). Initially, we let  $Q_1 = \{T_1, \dots, T_m\}$  be a set of distinct subsets of  $V$ , and set  $i \leftarrow 1$ . In iteration  $i \geq 1$ , solve the following (relatively small) MIP

$$\begin{aligned} \max_{\eta, \mathbf{y}} \quad & \eta \\ \text{s.t.} \quad & \eta \leq f(S) + \sum_{j \in V \setminus S} \rho_j(S) y_j, \quad \forall S \in Q_i = \{T_1, \dots, T_m, S_1, \dots, S_{i-1}\}, \\ & \sum_{j \in V} y_j = k, \quad y_j \in \{0, 1\}, \quad \forall j \in V, \end{aligned} \tag{S1}$$

and let  $(\eta_i, \mathbf{I}_{S_i})$  be an optimal solution to (S1). Since the feasible region of (S1) is larger than or equal to that of (10),  $\eta_i$  is an upper bound on  $\eta^*$ . Thus, we have  $f(S_i) \leq \eta^* \leq \eta_i$ . Therefore, if  $f(S_i) = \eta_i$ ,  $S_i$  is an optimal solution to the submodular maximization problem. If  $f(S_i) < \eta_i$ , set  $Q_{i+1} \leftarrow Q_i \cup \{S_i\}$ ,  $i \leftarrow i + 1$  and execute the next iteration. The description of the algorithm is given in Alg. 3. It terminates after at most  $\binom{n}{k}$  iterations.

Note that  $\eta_1 \geq \eta_2 \geq \dots \geq \eta^*$ . Thus, Alg. 3 can also be regarded as a subroutine just for the nonincreasing upper bound  $\eta_i$ .
